# Supplementary material for: Barriers to uptake of RTS, S malaria vaccine in a malaria endemic area of western Kenya
Source: Research Square preprint supplement (doi:10.21203/rs.3.rs-5366530/v1), 2024-12-01
Supplement: Supplementary file 1 [file 4b13b25ca396db8098f34c11.docx]

**Sociodemographic Table 1.**

|  | ***Three FGD for caregivers*** | | | ***One FGD for CHV*** | ***KIIs for*** nurses in charge of maternal and child health (MCH) clinics |
| --- | --- | --- | --- | --- | --- |
| ***Category*** | Parents/guardians *of children who completed the recommended 4doses.* | Parents/guardians *of children who did not complete the recommended 4 doses* | Parents/guardian*s of children who did not take any RTS, S vaccine* | *None* | *None* |
| ***Gender*** | | | | | |
| Female | 9 | 6 | 9 | 7 | 11 |
| Male | 1 | 0 | 0 | 4 | 0 |
| ***Age*** | | | | | |
| 20-29 | 4 | 3 | 3 | 0 | 1 |
| 30-39 | 3 | 3 | 4 | 3 | 3 |
| 40-49 | 3 | 0 | 2 | 5 | 5 |
| 50 and above | 0 | 0 |  | 3 | 2 |
| ***Level of education*** | | | | | |
| Primary completes | 5 | 4 | 9 | Not asked (NA) | 0 |
| Secondary complete | 4 | 2 | 0 | NA | 0 |
| Tertiary complete | 1 | 0 | 0 | NA | 11 |
